# Supplementary material for: Comprehensive Cultivation of the Swine Gut Microbiome Reveals High Bacterial Diversity and Guides Bacterial Isolation in Pigs
Source: PubMed Central journal article supplement (PMC8407297; doi:10.1128/msystems.00477-21), 2021-07-20

a

ASV109. Firmicutes Clostridium  
 ASV17. Actinobacteria Collinsella  
 ASV1. Firmicutes Megasphaera  
 ASV121 Firmicutes Lactobacillus  
 ASV68. Actinobacteria Bifidobacterium  
 ASV100. Firmicutes Acidaminococcus  
 ASV56. Bacteroidetes Bacteroides  
 ASV679. Firmicutes Enterococcus  
 ASV7. Proteobacteria Escherichia  
 ASV2810. Bacteroidetes Bacteroides  
 ASV127. Actinobacteria Bifidobacterium  
 ASV382. Firmicutes Mitsuokella  
 ASV1001. Firmicutes Bacillus  
 ASV238. Firmicutes Mitsuokella  
 ASV8. Firmicutes Phascolarctobacterium  
 ASV2192. Firmicutes Clostridium  
 ASV234. Firmicutes Sharpea  
 ASV180. Actinobacteria Coriobacteriaceae\_  
 ASV219. Firmicutes Lactobacillus  
 ASV122. Firmicutes Acidaminococcus  
 ASV194. Firmicutes Lactobacillus  
 ASV450. Firmicutes Sharpea  
 ASV663. Firmicutes Dialister  
 ASV5. Firmicutes Lactobacillus  
 ASV1003. Firmicutes Bacillaceae\_  
 ASV164. Actinobacteria Bifidobacterium  
 ASV427. Firmicutes Mitsuokella  
 ASV95. Firmicutes Streptococcus  
 ASV3. Bacteroidetes Prevotella  
 ASV1002. Firmicutes Bacillus

Red: Aerobic\_preferred  
 Black: Anaerobic\_preferred

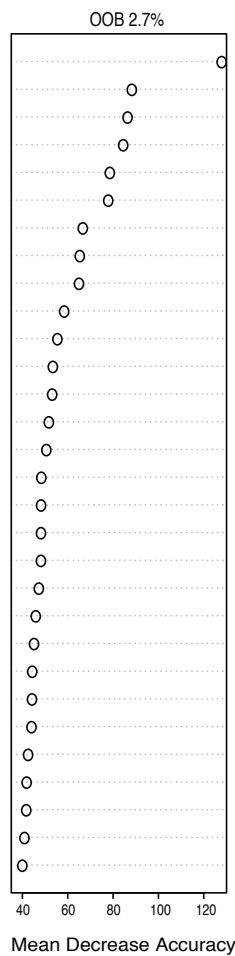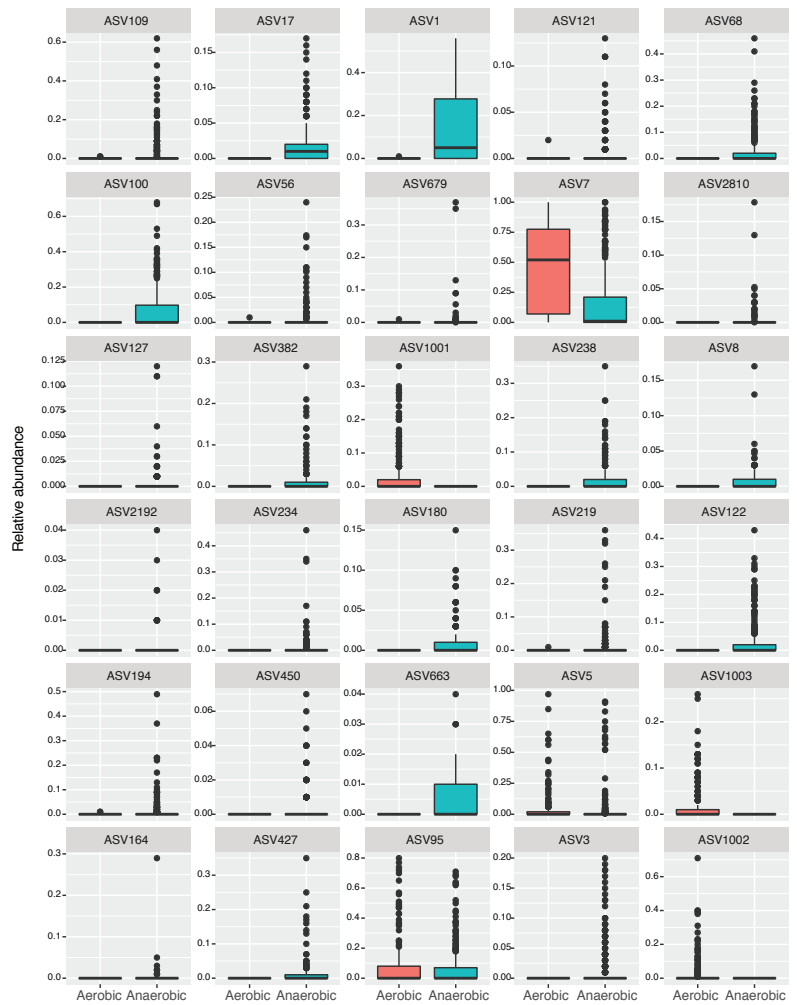

b

ASV95. Firmicutes Streptococcus  
 ASV100. Firmicutes Acidaminococcus  
 ASV7. Proteobacteria Escherichia  
 ASV5. Firmicutes Lactobacillus  
 ASV1001. Firmicutes Bacillus  
 ASV249. Firmicutes Lactobacillus  
 ASV1002. Firmicutes Bacillus  
 ASV109. Firmicutes Clostridium  
 ASV1. Firmicutes Megasphaera  
 ASV454. Firmicutes Lactobacillus  
 ASV1003. Firmicutes Bacillaceae\_  
 ASV1004. Firmicutes Bacillus  
 ASV1008. Firmicutes Bacillales\_  
 ASV17. Actinobacteria Collinsella  
 ASV131. Firmicutes Lactobacillus  
 ASV2. Firmicutes Streptococcus  
 ASV848. Firmicutes Lactobacillus  
 ASV70. Firmicutes Lactobacillus  
 ASV122. Firmicutes Acidaminococcus  
 ASV68. Actinobacteria Bifidobacterium  
 ASV187. Firmicutes Lactobacillus  
 ASV238. Firmicutes Mitsuokella  
 ASV234. Firmicutes Sharpea  
 ASV79. Firmicutes Mitsuokella  
 ASV428. Firmicutes Enterococcus  
 ASV127. Actinobacteria Bifidobacterium  
 ASV1006. Firmicutes Bacillus  
 ASV67. Firmicutes Mitsuokella  
 ASV1007. Proteobacteria Aggregatibacter  
 ASV1005. Firmicutes Planococcaceae\_

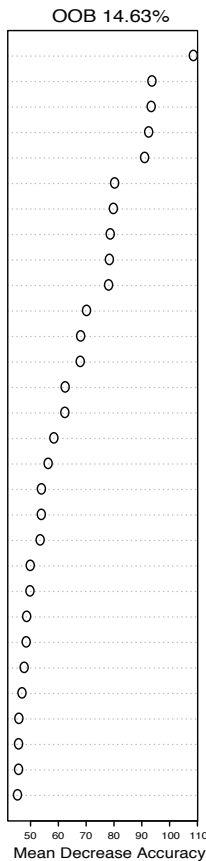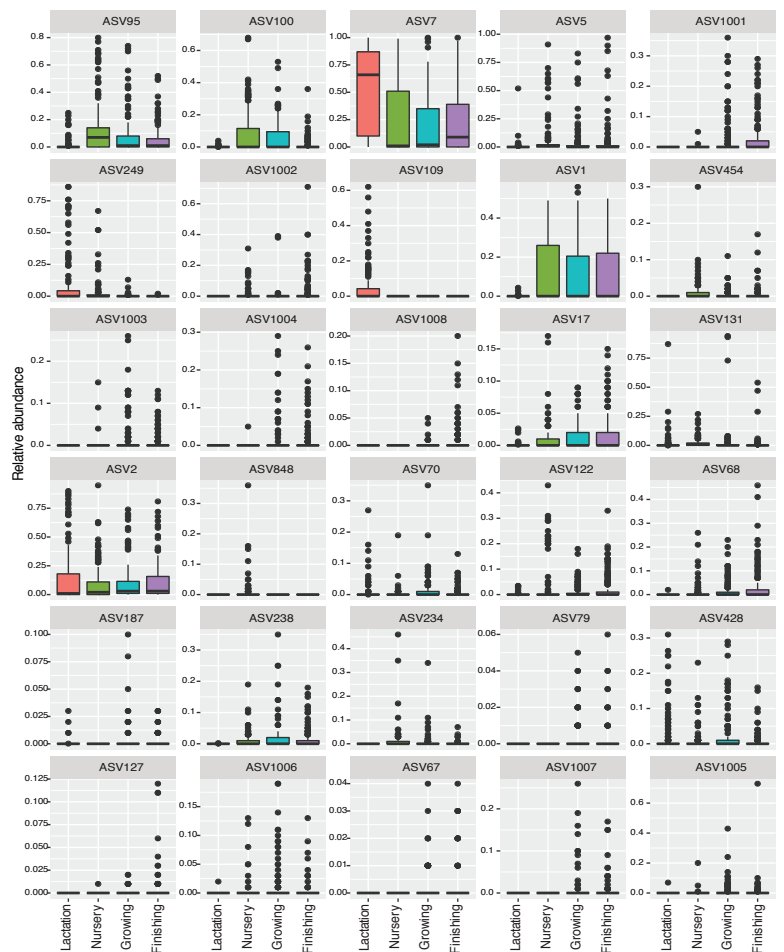

Supplement: msystems.00477-21-sf003.pdf [file msystems.00477-21-sf003.pdf]
