# Supplementary material for: Comprehensive Cultivation of the Swine Gut Microbiome Reveals High Bacterial Diversity and Guides Bacterial Isolation in Pigs
Source: PubMed Central journal article supplement (PMC8407297; doi:10.1128/msystems.00477-21), 2021-07-20

a

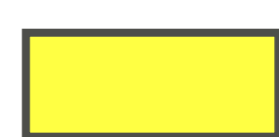

Culture-dependent

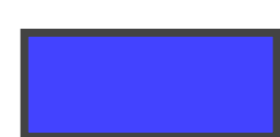

Culture-independent

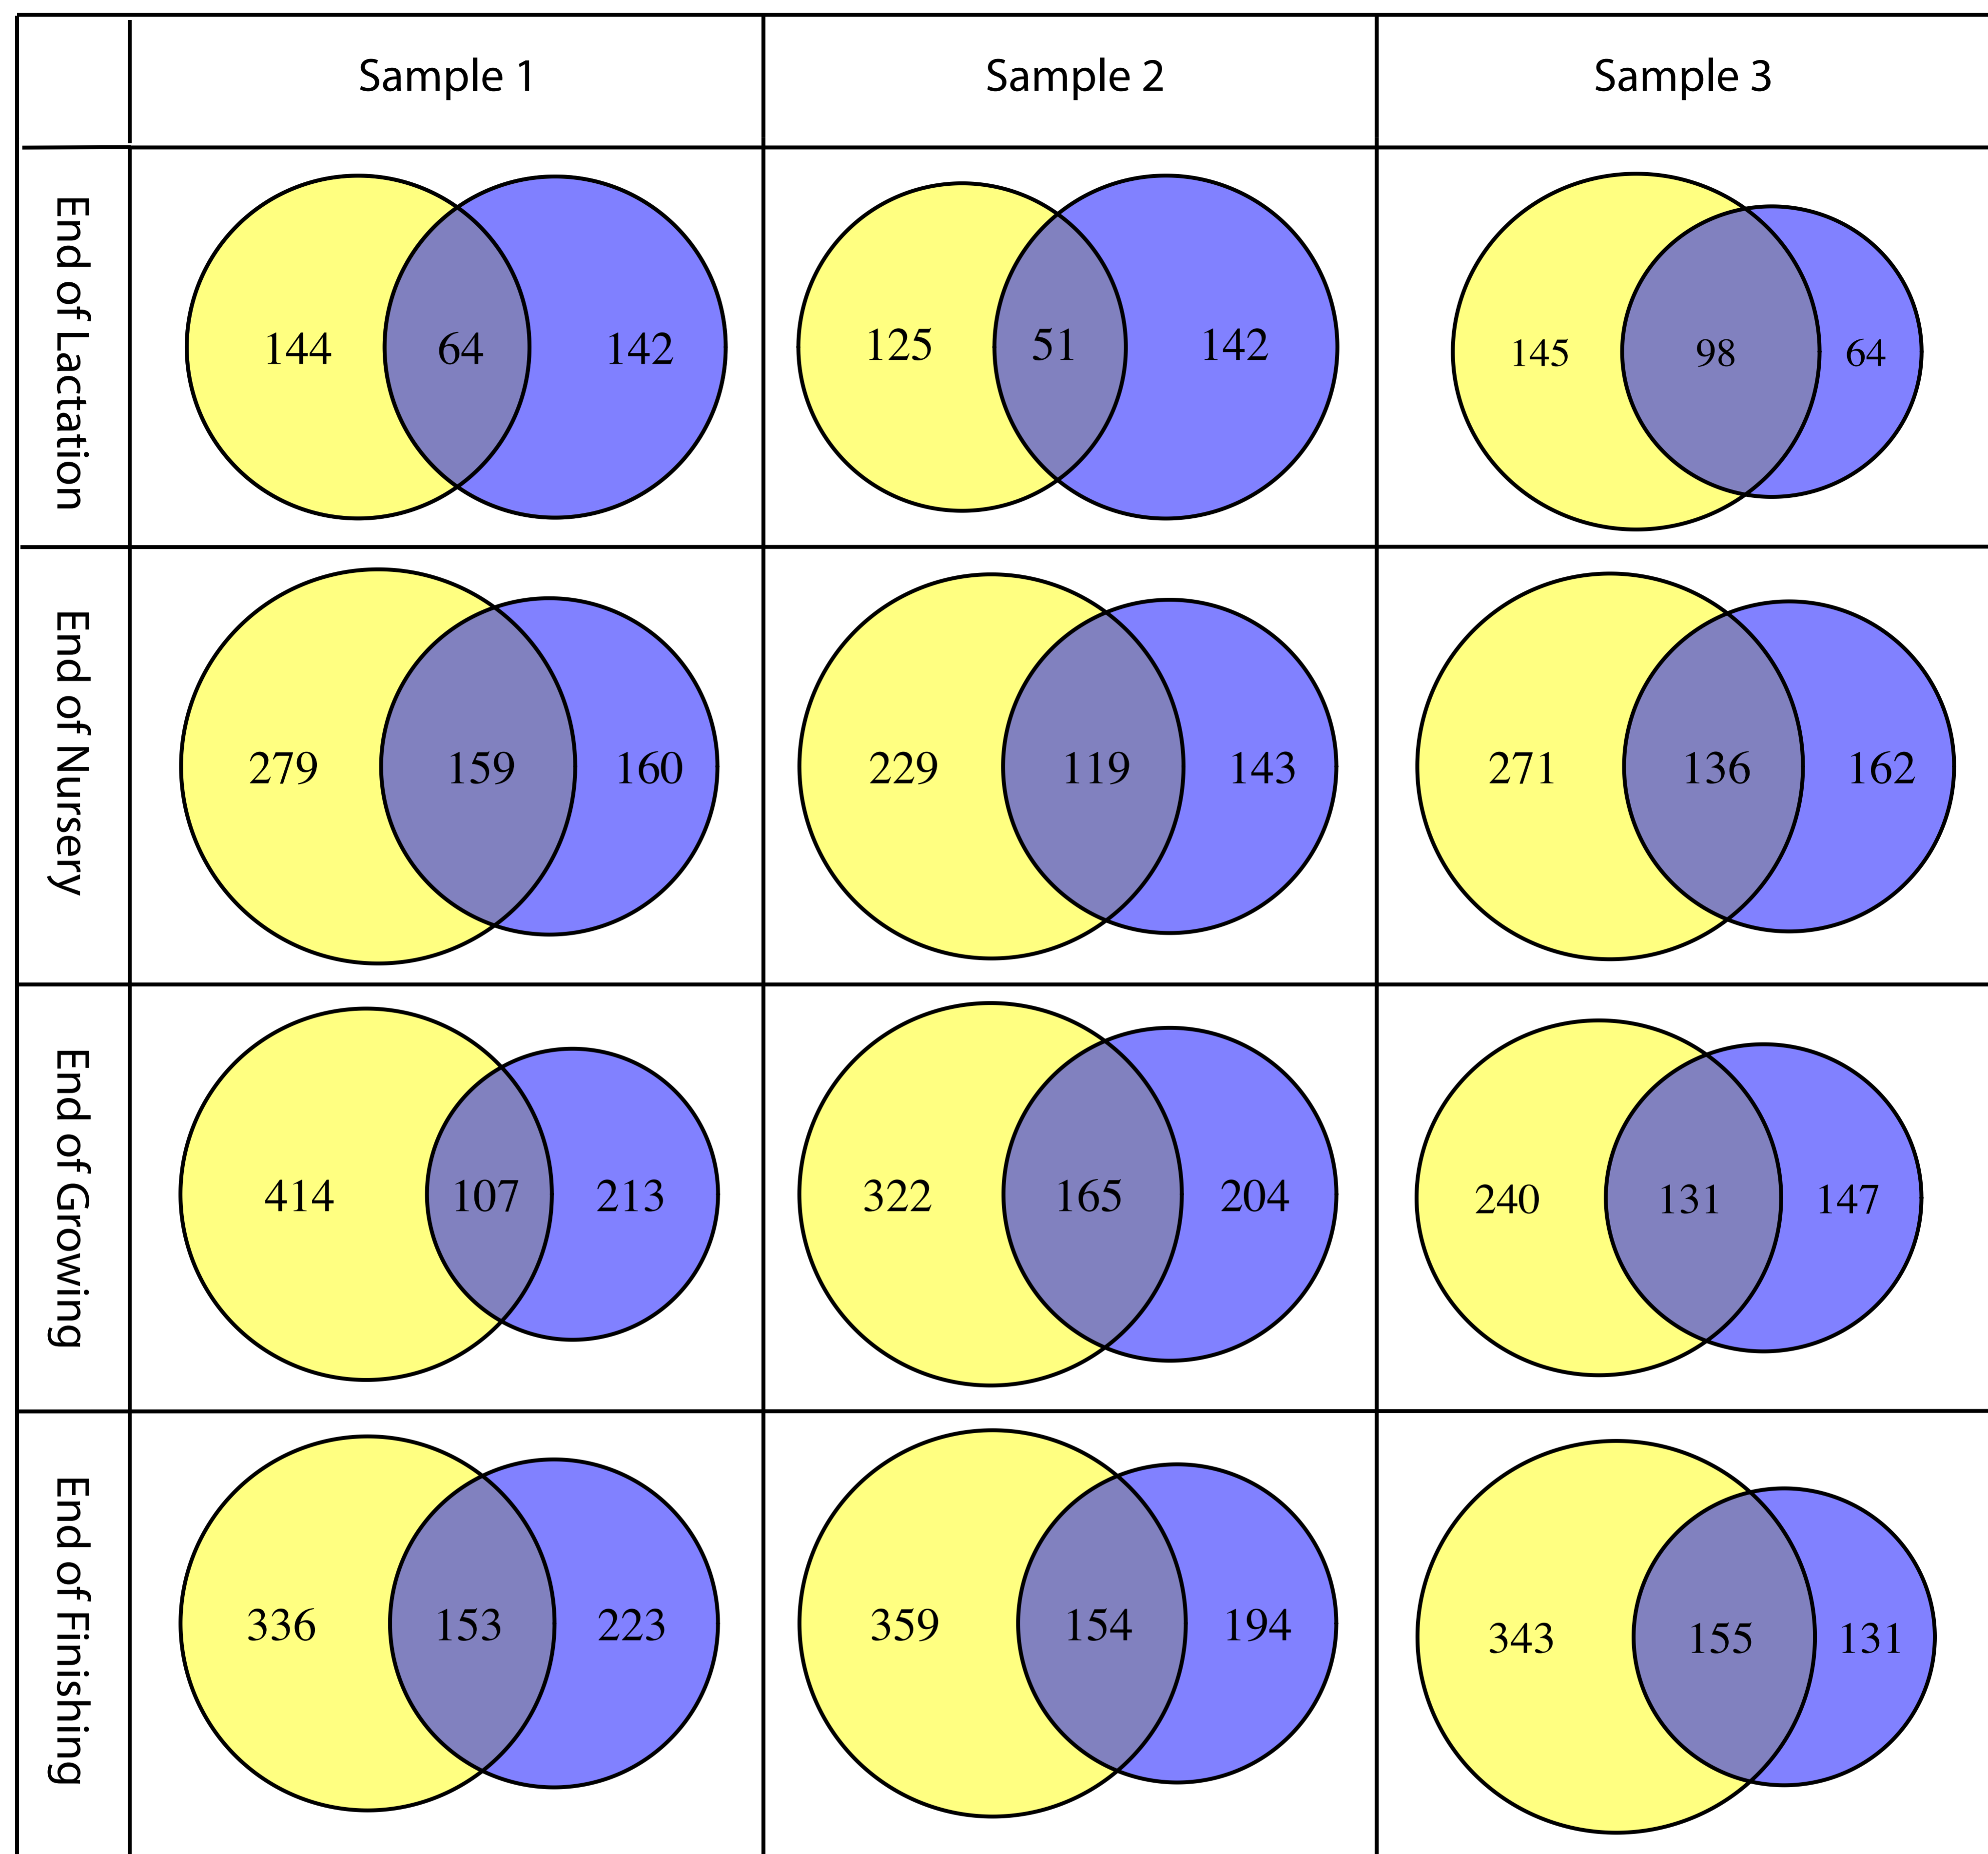

b

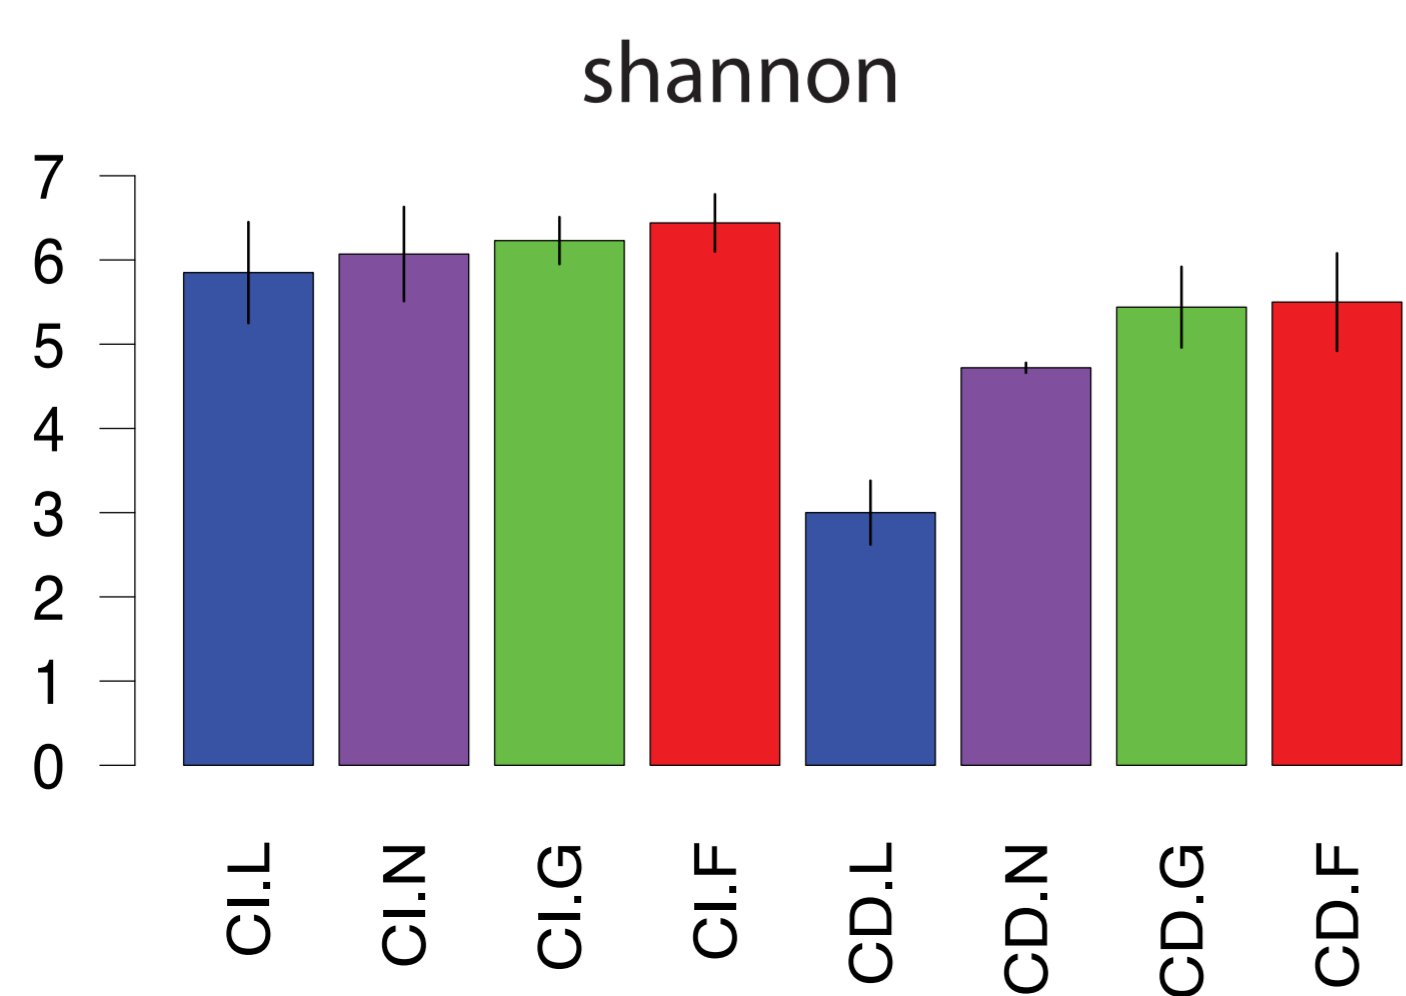

c

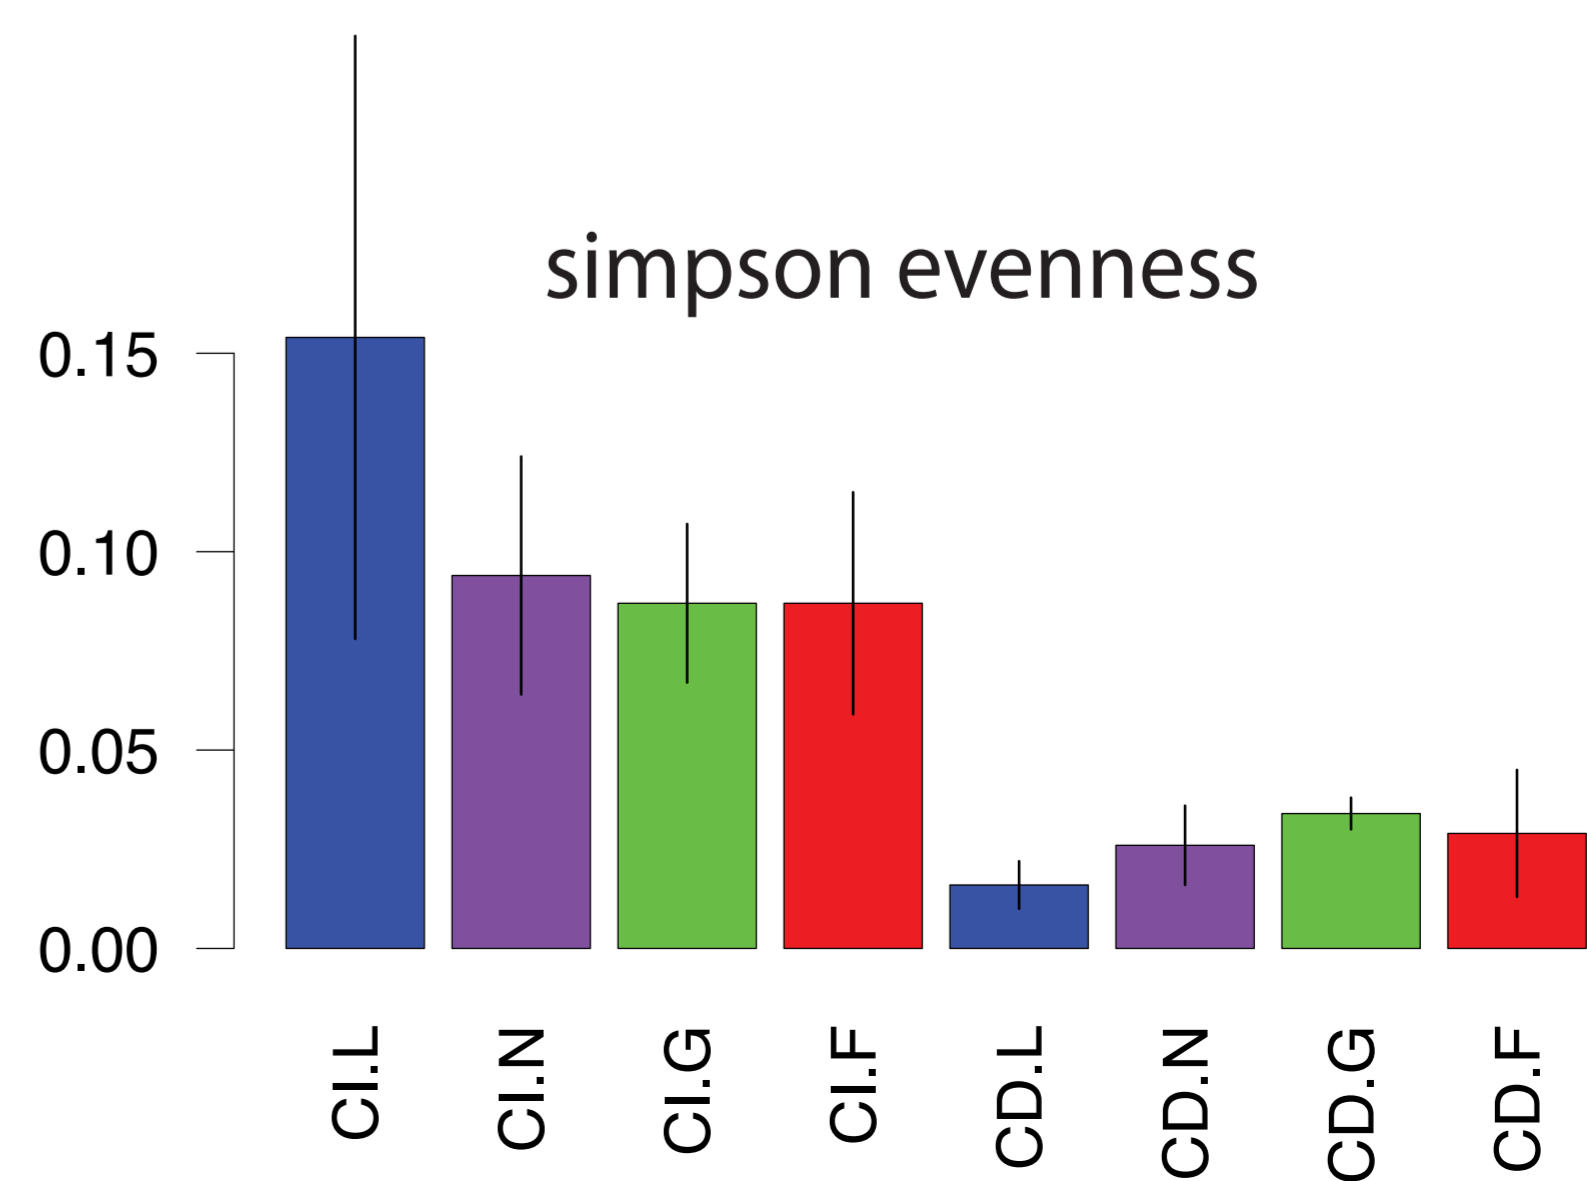

Supplement: msystems.00477-21-sf001.pdf [file msystems.00477-21-sf001.pdf]
