# Supplementary material for: Comprehensive Cultivation of the Swine Gut Microbiome Reveals High Bacterial Diversity and Guides Bacterial Isolation in Pigs
Source: PubMed Central journal article supplement (PMC8407297; doi:10.1128/msystems.00477-21), 2021-07-20

Bray-Curtis

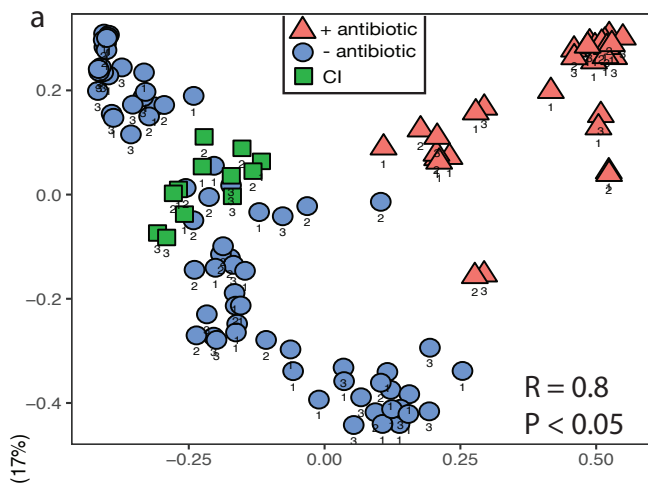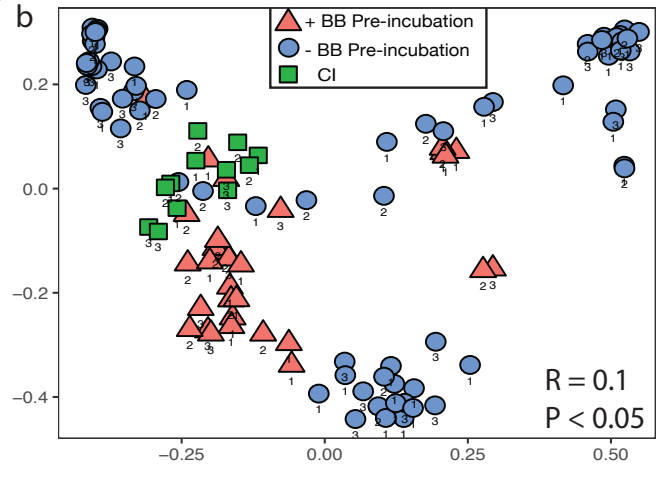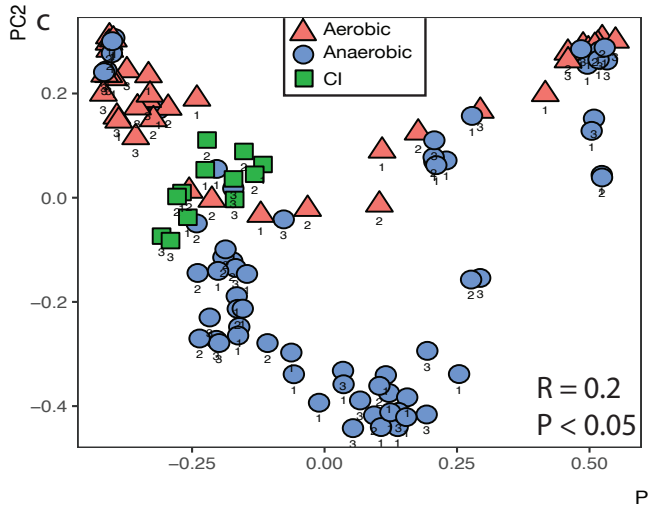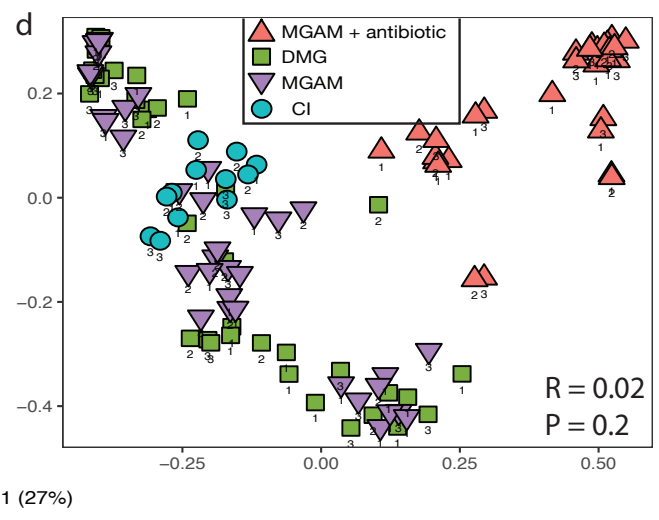

**e**

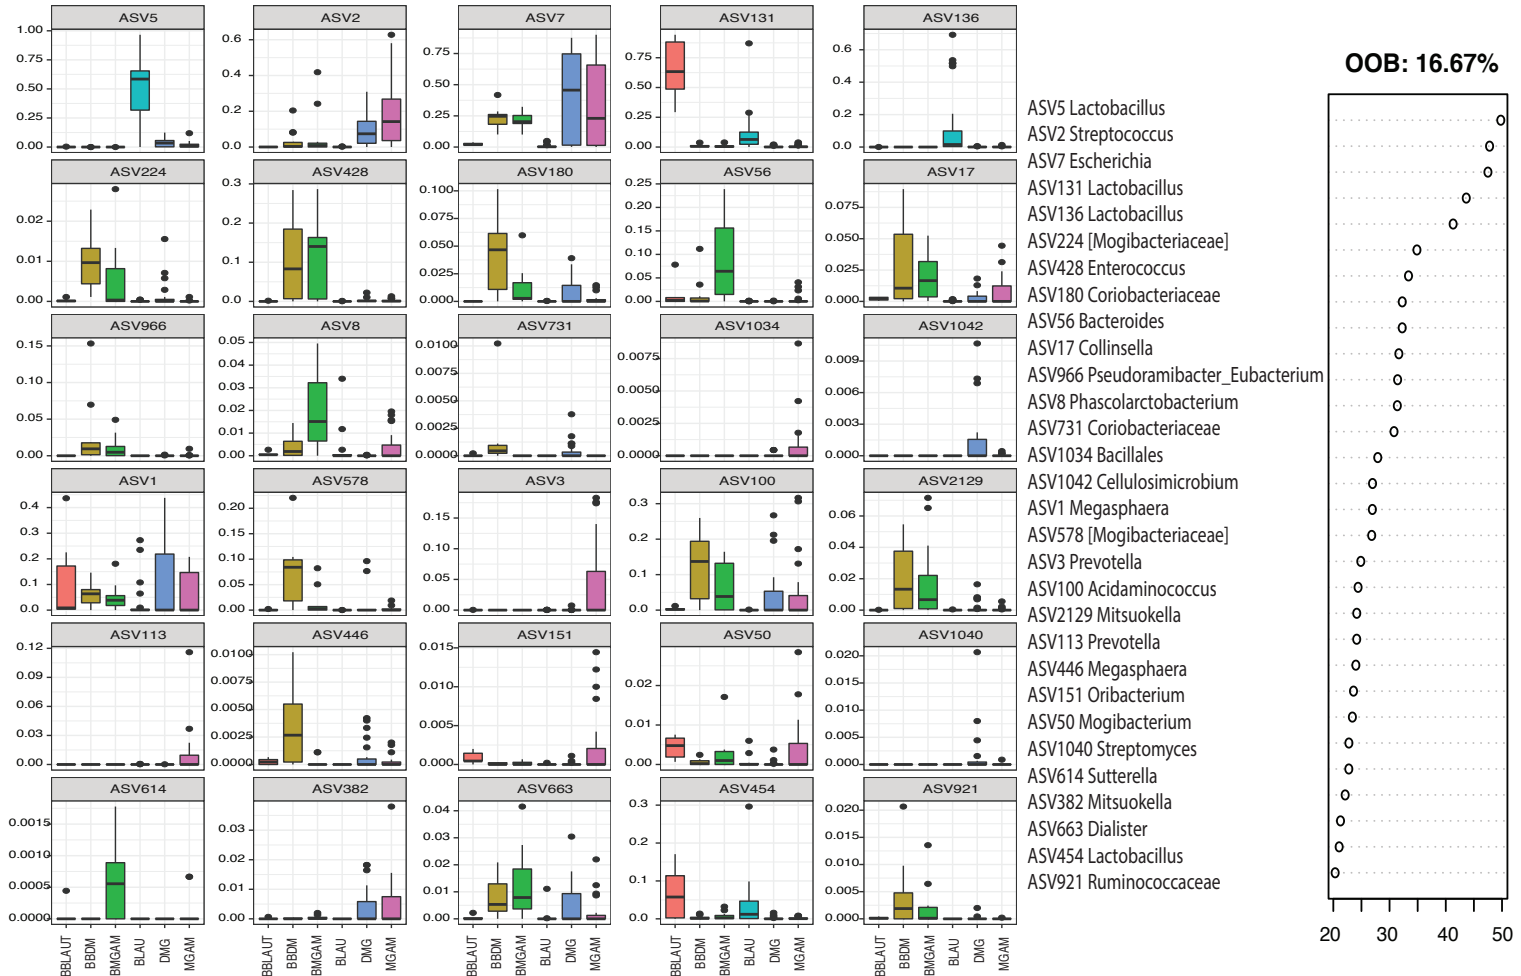

Supplement: msystems.00477-21-sf005.pdf [file msystems.00477-21-sf005.pdf]
